# Supplementary material
Source: PubMed Central journal article supplement (PMC3156323)
Supplement: NIHMS305821-supplement-Supplementary_Figures.pdf [file NIHMS305821-supplement-Supplementary_Figures.pdf]

## **Characterization of full-length MHC class II sequences in Indonesian and Vietnamese cynomolgus macaques**

Hannah M Creager<sup>1</sup>, Ericka A. Becker<sup>1</sup>, Kelly K. Sandman<sup>1</sup>, Julie A. Karl<sup>1</sup>, Simon M. Lank<sup>1</sup>, Benjamin N. Bimber<sup>1</sup>, Roger W. Wiseman<sup>1</sup>, Austin L Hughes<sup>2</sup>, Shelby L. O'Connor<sup>3</sup>, David H. O'Connor<sup>1,3</sup>

<sup>1</sup>Wisconsin National Primate Research Center, University of Wisconsin-Madison, Madison, Wisconsin, USA 53715;

<sup>2</sup>Department of Biological Sciences, University of South Carolina, Columbia, SC 29208, USA;

<sup>3</sup>Department of Pathology and Laboratory Medicine, University of Wisconsin-Madison, Madison, Wisconsin, USA 53705

### **Corresponding Author**

David H. O'Connor, Ph. D.

Wisconsin Primate Research Center

Department of Pathology and Laboratory Medicine

University of Wisconsin at Madison

Phone: 608-890-0845

Email: doconnor@primate.wisc.edu

Fax: 608-265-8084

**Supplemental Table 1** Previously described full-length *Mafa* alleles

| <i>Mafa</i> allele                     | Animals                                                                    | Animal origin | Previously documented origin(s) | Accession #                                                        |
|----------------------------------------|----------------------------------------------------------------------------|---------------|---------------------------------|--------------------------------------------------------------------|
| <i>DPA1*02:03</i>                      | IN11                                                                       | Indonesia     | Ma (M5)                         | EF208807 (1)                                                       |
| <i>DPA1*04:01</i>                      | DR010, DR013, DR016, DR020                                                 | Vietnam       | Ma (M4)                         | EF208808 (1)                                                       |
| <i>DPA1*07:02</i>                      | CE12                                                                       | Indonesia     | Ma (M1)                         | EF208810 (1)                                                       |
| <i>DPB1*21</i>                         | DR015, DR019, CE23                                                         | Both          | In, Ma (M5, M6), Vi             | AB235876 (2), AM086068 (3), EF208811 (1)                           |
| <i>DPB1*29</i>                         | IN01                                                                       | Indonesia     | In, Ma (M3)                     | AB235884 (2), EF208813 (1)                                         |
| <i>DPB1*42</i>                         | CE12                                                                       | Indonesia     | Ma (M1)                         | EF208814 (1)                                                       |
| <i>DQA1*01:06</i>                      | CE28                                                                       | Indonesia     | Ma (M5)                         | EF208817 (1)                                                       |
| <i>DQA1*01:07</i>                      | DR014, DR015, IN04                                                         | Both          | Ma (M4)                         | EF208818 (1)                                                       |
| <i>DRA*01:01:06</i>                    | CE16, IN04, WF05                                                           | Indonesia     | In, Ph                          | AB306633 (4), EU877210 (5)                                         |
| <i>DRA*01:02:01</i> group <sup>a</sup> | DR009, DR010, DR011, DR012, DR017, CE03, CE06, CE12, CE23 IN11, WF01, WF05 | Both          | Unk                             | AB306633 (4), EF208827 (1), EU877210 (5)                           |
| <i>DRA*01:03:01</i>                    | DR016, CE28, IN01, IN04, IN10, IN11                                        | Both          | In                              | AM943638 (4), EU877212 (5)                                         |
| <i>DRA*02:01:01</i> group <sup>a</sup> | CE28                                                                       | Indonesia     | Ma (M1)                         | AB306631 (4), EF208828 (1), EU877220 (5)                           |
| <i>DRB*W1:03</i>                       | WF05                                                                       | Indonesia     | Ma (Unk haplotype)              | AF492281 (7), AF492310 (7), AY362361 (6)                           |
| <i>DRB*W1:07</i>                       | IN04, WF01                                                                 | Indonesia     | Ch, Ph                          | AF492309 (7), AY340677 (6), DQ381754 (7)                           |
| <i>DRB*W4:01</i>                       | CE03, IN11                                                                 | Indonesia     | Ma (M6), Ph                     | AF492318 (7), AY340693 (6), EF442015 (1), DQ381744 (7)             |
| <i>DRB*W21:01</i>                      | CE28                                                                       | Indonesia     | Ma (M1)                         | AF492295 (7), AF492301 (7), AY340688 (6), EF208831 (1)             |
| <i>DRB1*04:02</i>                      | IN11                                                                       | Indonesia     | Ma (M2), Ph                     | AF492337 (7), AY340694 (6), DQ381741 (7), EF442018 (1), L76650 (8) |
| <i>DRB5*03:01:01</i>                   | DR016                                                                      | Vietnam       | Ma (M4)                         | AF492288 (7), AF492325 (7), AY340698 (6), EF208835 (1)             |

<sup>a</sup>Multiple alleles which differ from one another only outside the coding region make up these groups. Due to space constraints, accession numbers are listed for one variant only.

All *Mafa* MHC class II alleles identified in this study were compared with those available in GenBank. Those which perfectly matched previously identified alleles for which the entire coding sequence was known are listed here. “Animal origin” indicates the origin of all animals in which the allele was detected in this study. “Both” denotes alleles found in the Indonesian and Vietnamese cohorts. Previously documented origin information was taken from the corresponding publication(s) and/or Genbank record(s). The abbreviations used were In=Indonesia, Ch=China, Ma=Mauritius, Ph=Philippines, Vi=Vietnam, Unk=Unknown. Mauritian haplotypes are indicated in parentheses. References for accession numbers are (1) O'Connor et al. 2007, (2) Sano et al. 2006, (3) Doxiadis et al. 2006, (4) unpublished, various sources, (5) Aarnink et al. 2010, (6) Leuchte et al. 2004, (7) Blancher et al. 2006, (8) Gaur and Nepom 1996.

**Supplemental Table 2** Nucleotide sequences from other macaque species identical to novel *Mafa* alleles

| <i>Mafa</i> allele name | <i>Mafa</i> accession # | Animals                  | Animal origin ( <i>Mafa</i> ) | Identical sequence from other macaque species                                    | Accession # of identical sequence      |
|-------------------------|-------------------------|--------------------------|-------------------------------|----------------------------------------------------------------------------------|----------------------------------------|
| <i>DPAI*02:07</i>       | HM580026                | DR012                    | Vietnam                       | <i>Maar-DPA*02:01</i> <sup>a</sup><br><i>Mamu-DPAI*02</i> lineage <sup>a,b</sup> | AF026703 (1)<br>AB548932 (3)           |
| <i>DPAI*02:08:01</i>    | HM580029                | DR017                    | Vietnam                       | <i>Mamu-DPAI*02:02:01</i>                                                        | EF204948 (2)                           |
| <i>DPAI*02:13</i>       | HM579967                | IN10                     | Indonesia                     | <i>Maar-DPA*02:01</i> <sup>a</sup><br><i>Mamu-DPAI*02</i> lineage <sup>a,b</sup> | AF026703 (1)<br>AB548932 (3)           |
| <i>DPAI*04:02</i>       | HM579969                | CE23, IN01, WF01         | Indonesia                     | <i>Mamu-DPAI*04:03</i>                                                           | GQ471885 (3)                           |
| <i>DPAI*06:01</i>       | HM580027                | DR012                    | Vietnam                       | <i>Mamu-DPAI*06:01</i>                                                           | EF204949 (2), AB250753 (3)             |
| <i>DPAI*07:04</i>       | HM579964                | CE12, CE28               | Indonesia                     | <i>Mamu-DPAI*07</i> lineage <sup>b</sup>                                         | AB250757 (3)                           |
| <i>DQAI*01:10</i>       | HM579993                | CE23                     | Indonesia                     | <i>Mamu-DQAI*01:08</i> <sup>a</sup>                                              | AF091334 (4), FN395348 (3)             |
| <i>DQAI*01:12</i>       | HM580050                | DR016                    | Vietnam                       | <i>Maar-DQAI*01:01</i> <sup>a</sup><br><i>Mamu-DQAI*01:02</i>                    | M76204 (5)<br>EF362440 (2), M76200 (5) |
| <i>DQAI*05:03:02</i>    | HM579988                | DR012, DR020, IN10, CE23 | Both                          | <i>Mamu-DQAI*05:02</i> <sup>a</sup>                                              | S76215 (6)                             |
| <i>DQAI*24:05</i>       | HM579991                | DR009, DR018, CE12       | Both                          | <i>Mamu-DQAI*24</i> lineage <sup>b</sup>                                         | AB551651 (3)                           |
| <i>DQAI*26:04</i>       | HM580048                | DR014, DR019             | Vietnam                       | <i>Mamu-DQAI*26:01</i>                                                           | M76228 (5), EU934780 (3)               |
| <i>DQBI*18:21</i>       | HM580002                | CE03                     | Indonesia                     | <i>Mamu-DQBI*18:18</i> <sup>a</sup>                                              | EU580130 (7)                           |

<sup>a</sup>Available sequence limited to exon 2

<sup>b</sup>Allele not officially named. Lineage inferred based on alignment with available sequences.

Novel *Mafa* alleles were compared to MHC class II sequences from other macaque species available in GenBank. Nucleotide-identical sequences are listed here. “Animal origin” indicates the origin of all animals in which the allele was detected in this study. “Both” denotes alleles found in both the Indonesian and Vietnamese cohorts. References for accession numbers are (1) Otting and Bontrop 1995, (2) Giraldo-Vela et al. 2008, (3) unpublished, various sources, (4) Sauermann 1998, (5) Kenter et al. 1992, (6) Christ et al. 1994, (7) Qiu et al. 2008.

## References Cited in Supplemental Material

- Aarnink, A, Estrade, L, Apoil, PA, Kita, YF, Saitou, N, Shiina, T, Blancher, A (2010) Study of cynomolgus monkey (*Macaca fascicularis*) DRA polymorphism in four populations. *Immunogenetics* 62: 123–136
- Blancher, A, Tisseyre, P, Dutaur, M, Apoil, PA, Maurer, C, Quesniaux, V, Raulf, F, Bigaud, M, Abbal, M (2006) Study of Cynomolgus monkey (*Macaca fascicularis*) MhcDRB (Mafa-DRB) polymorphism in two populations. *Immunogenetics* 58: 269–282
- Christ, R, Hunsmann, G, Sauermann, U (1994) PCR-RFLP-based DQA1 typing of rhesus monkeys: sequence analysis of a new allele. *Tissue Antigens* 44: 241–247
- Doxiadis, GG, Rouweler, AJ, de Groot, NG, Louwense, A, Otting, N, Verschoor, EJ, Bontrop, RE (2006) Extensive sharing of MHC class II alleles between rhesus and cynomolgus macaques. *Immunogenetics* 58: 259–268
- Gaur, LK, Nepom, GT (1996) Ancestral major histocompatibility complex DRB genes beget conserved patterns of localized polymorphisms. *Proc Natl Acad Sci U S A* 93: 5380–5383
- Giraldo-Vela, JP, Rudersdorf, R, Chung, C, Qi, Y, Wallace, LT, Bimber, B, Borchardt, GJ, Fisk, DL, Glidden, CE, Loffredo, JT, Piaskowski, SM, Furlott, JR, Morales-Martinez, JP, Wilson, NA, Rehrauer, WM, Lifson, JD, Carrington, M, Watkins, DI (2008) The major histocompatibility complex class II alleles Mamu-DRB1\*1003 and -DRB1\*0306 are enriched in a cohort of simian immunodeficiency virus-infected rhesus macaque elite controllers. *J Virol* 82: 859–870
- Kenter, M, Otting, N, Anholts, J, Leunissen, J, Jonker, M, Bontrop, RE (1992) Evolutionary relationships among the primate Mhc-DQA1 and DQA2 alleles. *Immunogenetics* 36: 71–78
- Leuchte, N, Berry, N, Kohler, B, Almond, N, LeGrand, R, Thorstenson, R, Titti, F, Sauermann, U (2004) MhcDRB-sequences from cynomolgus macaques (*Macaca fascicularis*) of different origin. *Tissue Antigens* 63: 529–537
- O'Connor, SL, Blasky, AJ, Pendley, CJ, Becker, EA, Wiseman, RW, Karl, JA, Hughes, AL, O'Connor, DH (2007) Comprehensive characterization of MHC class II haplotypes in Mauritian cynomolgus macaques. *Immunogenetics* 59: 449–462
- Otting, N, Bontrop, RE (1995) Evolution of the major histocompatibility complex DPA1 locus in primates. *Hum Immunol* 42: 184–187
- Qiu, CL, Yang, GB, Yu, K, Li, Y, Li, XL, Liu, Q, Zhao, H, Xing, H, Shao, Y (2008) Characterization of the major histocompatibility complex class II DQB (MhcMamu-DQB1) alleles in a cohort of Chinese rhesus macaques (*Macaca mulatta*). *Hum Immunol* 69: 513–521
- Sano, K, Shiina, T, Kohara, S, Yanagiya, K, Hosomichi, K, Shimizu, S, Anzai, T, Watanabe, A, Ogasawara, K, Torii, R, Kulski, JK, Inoko, H (2006) Novel cynomolgus macaque MHC-DPB1 polymorphisms in three South-East Asian populations. *Tissue Antigens* 67: 297–306
- Sauermann, U (1998) DQ-haplotype analysis in rhesus macaques: implications for the evolution of these genes. *Tissue Antigens* 52: 550–557
